# Supplementary material for: SnNb2O6nanosheets for the electrocatalytic NRR: dual-active-center mechanism of Nb3cand Sn4c–Nb5cdimer
Source: Royal Society of Chemistry journal article supplement (doi:10.1039/d1se00919b), 2021-01-01
Supplement: d1se00919b1.pdf [file d1se00919b1.pdf]

## Supporting Information

### **SnNb<sub>2</sub>O<sub>6</sub> nanosheets for electrocatalytic NRR: dual-active-center mechanism of Nb<sub>3c</sub> and Sn<sub>4c</sub>-Nb<sub>5c</sub> dimer**

Xiaotian Li <sup>1#</sup>, Ye Tian <sup>2#</sup>, Xiaomiao Wang <sup>2</sup>, Yali Guo <sup>1</sup>, Ke Chu <sup>1\*</sup>

<sup>1</sup> *School of Materials Science and Engineering, Lanzhou Jiaotong University, Lanzhou 730070, China*

<sup>2</sup> *Department of Physics, College of Science, Hebei North University, Zhangjiakou 075000, Hebei, China*

\*Corresponding author. E-mail address: chukelut@163.com (K. Chu)

# These authors contributed equally to this work.

## Experimental Section

### Synthesis of $\text{SnNb}_2\text{O}_6$

All the chemicals are of analytical grade and used as received.  $\text{SnNb}_2\text{O}_6$  nanosheets were prepared by a two-step hydrothermal approach based on a reported method with a slight modification[1]. Briefly, 0.5 g of  $\text{Nb}_2\text{O}_5$  and 2.24 g of KOH were dissolved in 30 mL of deionized water under stirring for 10 min, which were hydrothermally treated in a Teflon-lined stainless-steel autoclave for 36 h. Afterwards, 0.42 g of  $\text{SnCl}_2 \cdot 2\text{H}_2\text{O}$  was added into the autoclave and the pH value was adjusted to 3 by HCl under vigorous stirring. The above mixed solution was secondly hydrothermally treated in a Teflon-lined stainless-steel autoclave for 36 h. After cooling to room temperature, the obtained  $\text{SnNb}_2\text{O}_6$  were washed with deionized water and ethanol several times, and dried at 60 °C overnight.

### Electrochemical experiments

Electrochemical measurements were carried out on a CHI-760E electrochemical workstation using a conventional three-electrode cell[2]. The catalyst coated on carbon cloth (CC) was used as the working electrode, Ag/AgCl (saturated KCl) electrode was used as the reference electrode, and graphite rod was used as the counter electrode. All potentials were referenced to reversible hydrogen electrode (RHE) on the basis of  $E_{\text{RHE}} (\text{V}) = E_{\text{Ag/AgCl}} + 0.197 + 0.059 \times \text{pH}$ . The CC ( $1 \times 1 \text{ cm}^2$ ) was pretreated by soaking it in 0.5 M  $\text{H}_2\text{SO}_4$  for 12 h, and then washed with deionized water several times and dried in air. The working electrode was fabricated by coating 20  $\mu\text{L}$  of the catalyst ink onto the pretreated CC ( $0.2 \text{ mg cm}^{-2}$ ) and dried in the air. The catalyst ink was fabricated by ultrasonically dispersing 1 mg of the catalyst in 100  $\mu\text{L}$  of ethyl alcohol containing 5  $\mu\text{L}$  of Nafion (5 wt%). The NRR tests were performed using an H-type two-compartment electrochemical cell separated by a Nafion 211 membrane. The Nafion membrane was pretreated by boiling it in 5%  $\text{H}_2\text{O}_2$  solution for 1 h, 0.5 M  $\text{H}_2\text{SO}_4$  for 1 h and deionized water for 1 h in turn. During each electrolysis, ultra-high-purity  $\text{N}_2$  gas (99.999%) was continuously purged into the cathodic chamber at a flow rate of  $20 \text{ mL min}^{-1}$ . After each NRR electrolysis,

the produced  $\text{NH}_3$  and possible  $\text{N}_2\text{H}_4$  were quantitatively determined by the indophenol blue method[3], and approach of Watt and Chrisp[4], respectively. The detailed procedures for determining the concentrations of  $\text{NH}_3$  and possible  $\text{N}_2\text{H}_4$  have been provided in our previous works [5-7].

### Characterizations

X-ray diffraction (XRD) pattern was recorded on a Rigaku D/max 2400 diffractometer. X-ray photoelectron spectroscopy (XPS) analysis was conducted on a PHI 5702 spectrometer. Transmission electron microscopy (TEM), high-angle annular dark-field scanning transmission electron microscopy (HAADF-STEM) and high-resolution transmission electron microscopy (HRTEM) were performed on a Tecnai G<sup>2</sup> F20 microscope.  $^1\text{H}$  nuclear magnetic resonance (NMR) measurements were carried out on a 500 MHz Bruker superconducting-magnet NMR spectrometer. The UV-vis absorbance measurements were recorded on a MAPADA P5 spectrophotometer.

### Calculation details

Spin-polarized density functional theory (DFT) calculations were conducted using a Cambridge sequential total energy package (CASTEP) [8]. The Perdew–Burke–Ernzerhof (PBE) generalized gradient approximation (GGA) functional was used for the exchange-correlation potential [8]. A cutoff energy of 650 eV is chosen and the convergence criteria of force and energy were set to be 0.01 eV Å<sup>-1</sup> and 1.0×10<sup>-5</sup> eV, respectively. The seven-layered  $\text{SnNb}_2\text{O}_6$  slab with a 2×2 supercell were constructed for slab modeling and a vacuum space of 15 Å was applied to all calculations to avoid interactions between periodic images.

The Gibbs free energy ( $\Delta G$ , 298 K) of reaction steps is calculated by [9]:

$$\Delta G = \Delta E + \Delta \text{ZPE} - T\Delta S \quad (1)$$

where  $\Delta E$  is the adsorption energy,  $\Delta \text{ZPE}$  is the zero point energy difference and  $T\Delta S$  is the entropy difference between the gas phase and adsorbed state. The entropies of free gases were acquired from the NIST database.

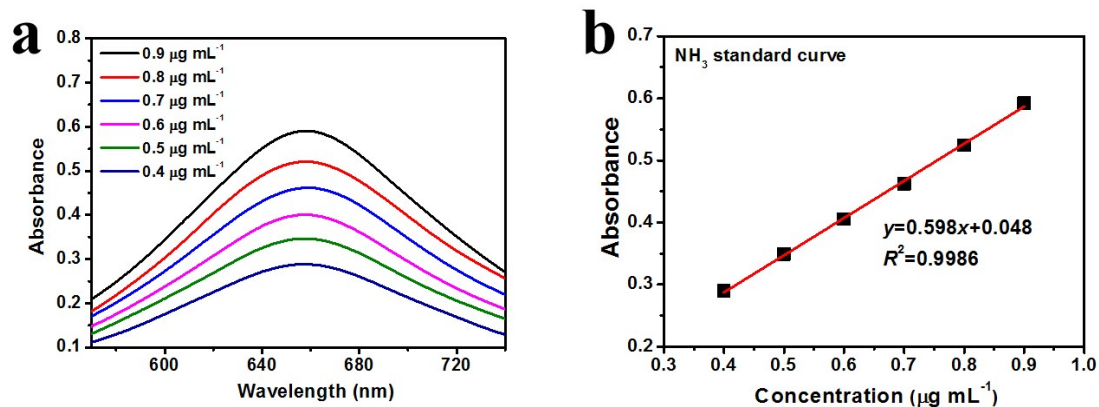

Fig. S1. (a) UV-vis absorption spectra of indophenol assays with  $\text{NH}_4\text{Cl}$  after incubated for 2 h at ambient conditions. (b) Calibration curve used for calculation of  $\text{NH}_3$  concentrations.

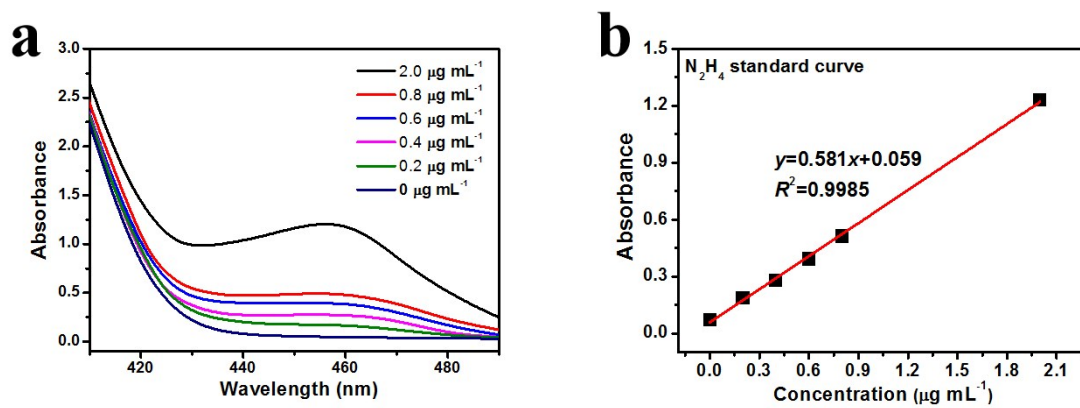

Fig. S2. (a) UV-vis absorption spectra of  $\text{N}_2\text{H}_4$  assays after incubated for 20 min at ambient conditions. (b) Calibration curve used for calculation of  $\text{N}_2\text{H}_4$  concentrations.

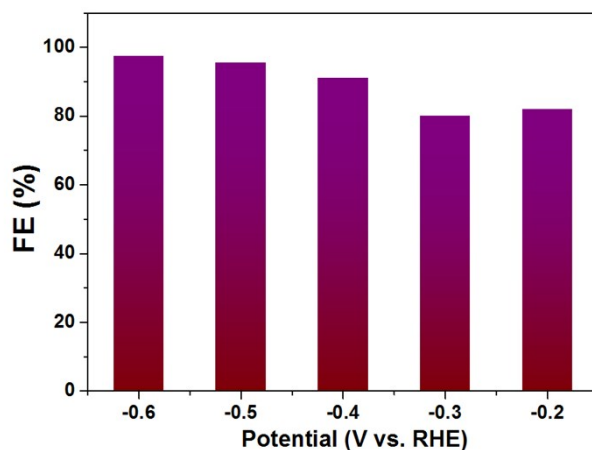

Fig. S3. FE of H<sub>2</sub> production at various potentials over SnNb<sub>2</sub>O<sub>6</sub>.

The FE for H<sub>2</sub> yield can be calculated by [10]

$$\text{FE (\%)} = \frac{2 \times F \times n}{Q} \times 100\% \quad (2)$$

where  $Q$  is the quantity of applied electricity.  $F$  is the Faraday constant,  $n$  is the actually produced H<sub>2</sub> (mol) obtained by gas chromatography (GC-2014C, Shimadzu) which is directly connected to the cathodic compartment[11]. Based on the FE data for H<sub>2</sub> production with the FE for NH<sub>3</sub> selectivity (Fig. 2d), the unaccounted values is possibly derived from the dynamic hydrogen adsorption on the catalyst, the capacitance of the support and the uncontrollable experimental error[12].

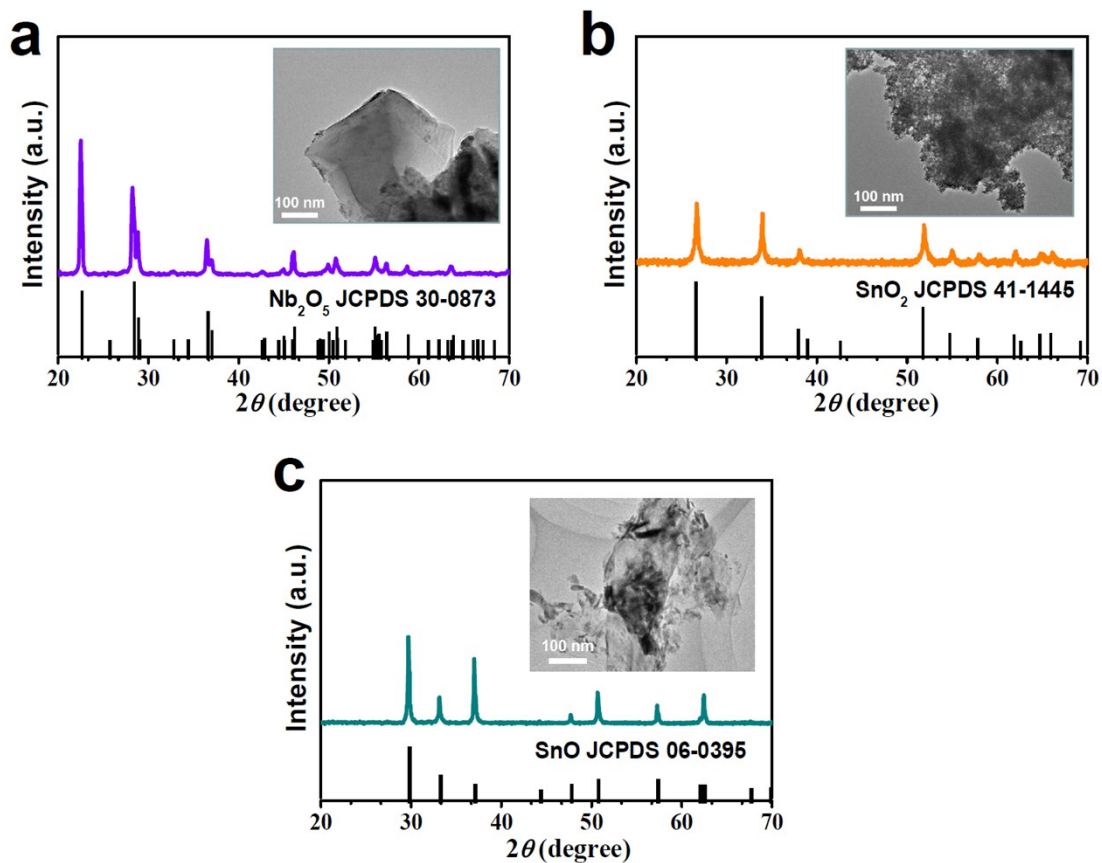

Fig. S4. (a) XRD pattern of Nb<sub>2</sub>O<sub>5</sub> nanosheets (inset: TEM image). (b) XRD pattern of SnO<sub>2</sub> nanosheets (inset: TEM image). (c) XRD pattern of SnO nanosheets (inset: TEM image). The Nb<sub>2</sub>O<sub>5</sub> nanosheets, SnO<sub>2</sub> nanosheets and SnO nanosheets were prepared based on the reported methods of [13], [14] and [15], respectively.

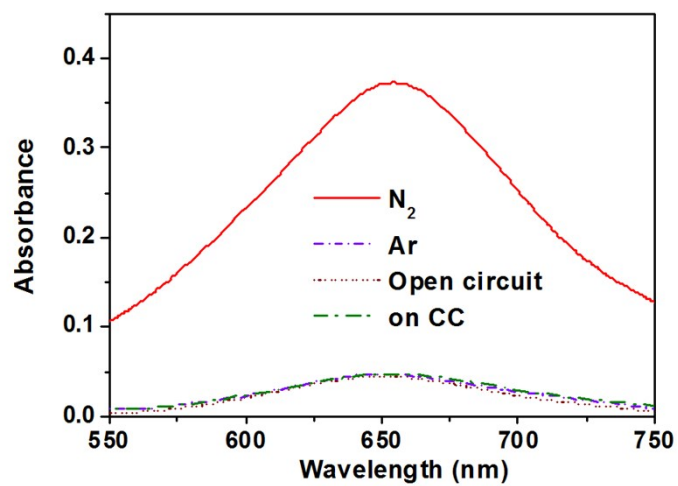

Fig. S5. UV-vis absorption spectra of working electrolytes after 2 h of electrolysis on  $\text{SnNb}_2\text{O}_6$  at  $-0.3$  V (vs. RHE) in  $\text{N}_2$ -saturated solution, Ar-saturated solutions,  $\text{N}_2$ -saturated solution at open circuit and  $\text{N}_2$ -saturated solution on pristine CC.



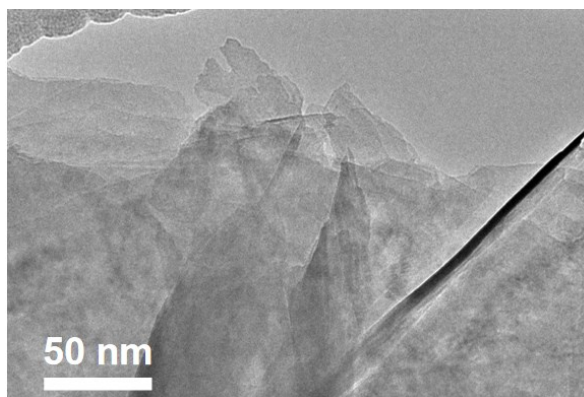

Fig. S6. TEM image of SnNb<sub>2</sub>O<sub>6</sub> after stability test.

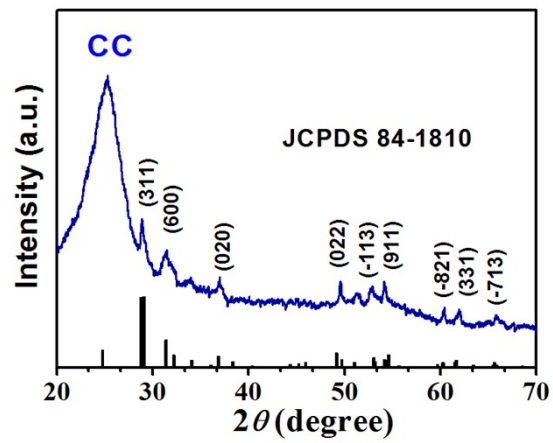

Fig. S7. XRD pattern of  $\text{SnNb}_2\text{O}_6$  after stability test.

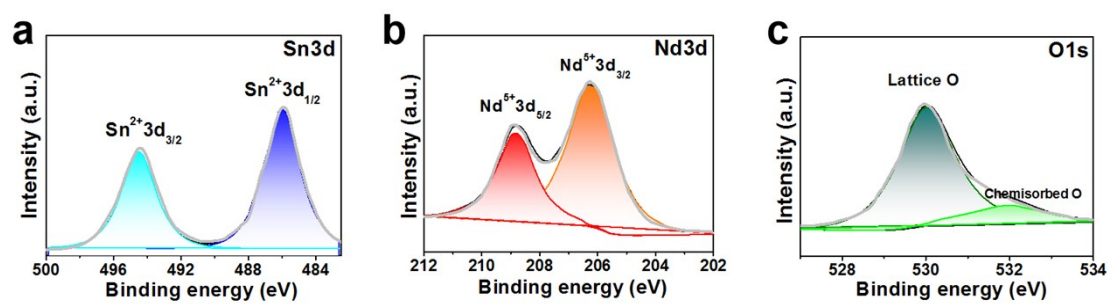

Fig. S8. XPS spectra of SnNb<sub>2</sub>O<sub>6</sub> nanosheets after stability test: (a) Sn3d; (b) Nd3d; (c) O1s.

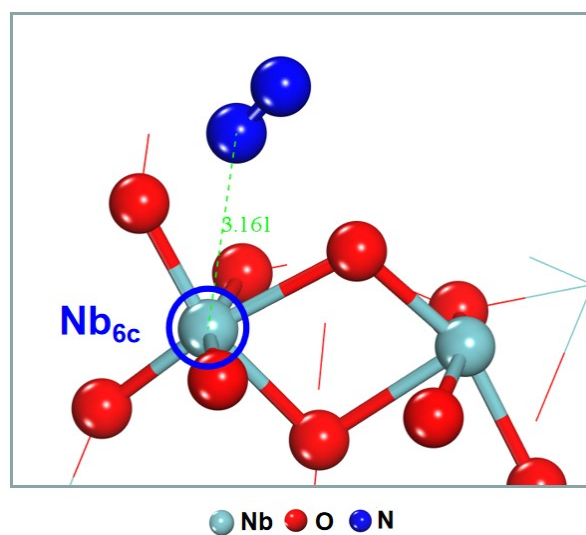

Fig. S9. Optimized structure of  $\text{N}_2$  adsorption on  $\text{Nb}_{6c}$  site of  $\text{SnNb}_2\text{O}_6$  (311) .

Table S1. Comparison of optimum NH<sub>3</sub> yield and Faradic efficiency (FE) for recently reported state-of-the-art NRR electrocatalysts at ambient conditions

| Catalyst                                    | Electrolyte                           | Determination method          | Optimum Potential (V Vs RHE) | NH <sub>3</sub> yield (μg h <sup>-1</sup> mg <sup>-1</sup> ) | FE (%)      | Ref.             |
|---------------------------------------------|---------------------------------------|-------------------------------|------------------------------|--------------------------------------------------------------|-------------|------------------|
| Pd/C                                        | 0.1 M PBS                             | Indophenol blue method        | 0.1                          | 4.5                                                          | 8.2         | [16]             |
| Mo single atoms                             | 0.1 M KOH                             | Indophenol blue method        | -0.3                         | 34                                                           | 14.6        | [17]             |
| Ru single atoms/NPC                         | 0.05 M H <sub>2</sub> SO <sub>4</sub> | Indophenol blue method        | -0.2                         | 120.9                                                        | 29.6        | [18]             |
| MoO <sub>3</sub> nanosheets                 | 0.1 M HCl                             | Indophenol blue method        | -0.5                         | 29.43                                                        | 1.9         | [19]             |
| Mo <sub>2</sub> C/C                         | 0.5 M Li <sub>2</sub> SO <sub>4</sub> | Nessler's reagent method      | -0.3                         | 11.3                                                         | 7.8         | [20]             |
| BiVO <sub>4</sub> with oxygen vacancies     | 0.2 M Na <sub>2</sub> SO <sub>4</sub> | Indophenol blue method        | -0.5                         | 8.6                                                          | 10.4        | [21]             |
| MoS <sub>2</sub> with Li-S Interactions     | 0.1 M Li <sub>2</sub> SO <sub>4</sub> | Indophenol blue method        | -0.2                         | 43.4                                                         | 9.81        | [22]             |
| S-doped carbon nanospheres                  | 0.1 M Na <sub>2</sub> SO <sub>4</sub> | Indophenol blue method        | -0.7                         | 19.07                                                        | 7.47        | [23]             |
| Cubic sub-micron SnO <sub>2</sub> particles | 0.1 M Na <sub>2</sub> SO <sub>4</sub> | Indophenol blue method        | -0.7                         | 4.03                                                         | 2.17        | [24]             |
| F-doped SnO <sub>2</sub>                    | 0.1 M Na <sub>2</sub> SO <sub>4</sub> | Indophenol blue method        | -0.45                        | 19.3                                                         | 8.6         | [25]             |
| Fe-doped SnO <sub>2</sub>                   | 0.1 M HCl                             | Indophenol blue method        | -0.3                         | 82.7                                                         | 20.4        | [26]             |
| SnO <sub>2</sub> /RGO                       | 0.1 M Na <sub>2</sub> SO <sub>4</sub> | Indophenol blue method        | -0.5                         | 25.6                                                         | 7.1         | [27]             |
| Nb <sub>2</sub> O <sub>5</sub> nanofibers   | 0.1 M HCl                             | Indophenol blue method        | -0.55                        | 43.6                                                         | 9.26        | [12]             |
| NbO <sub>2</sub> nanoparticles              | 0.05 M H <sub>2</sub> SO <sub>4</sub> | Indophenol blue method        | -0.65                        | 11.6                                                         | 32 (-0.6)   | [28]             |
| <b>SnNb<sub>2</sub>O<sub>6</sub></b>        | <b>0.5 M LiClO<sub>4</sub></b>        | <b>Indophenol blue method</b> | <b>-0.3</b>                  | <b>53.1</b>                                                  | <b>17.6</b> | <b>This work</b> |

### Supplementary references

- [1]. Z. Zhang, D. Jiang, D. Li, M. He and M. Chen, *Appl. Catal. B*, 2016, **183**, 113-123.
- [2]. Q. Li, Y. Cheng, X. Li, Y. Guo and K. Chu, *Chem. Commun.*, 2020, **56**, 13009-13012.
- [3]. D. Zhu, L. Zhang, R. E. Ruther and R. J. Hamers, *Nat. Mater.*, 2013, **12**, 836.
- [4]. G. W. Watt and J. D. Chrisp, *Anal. Chem.*, 1952, **24**, 2006-2008.
- [5]. W. Gu, Y. Guo, Q. Li, Y. Tian and K. Chu, *ACS Appl. Mater. Inter.*, 2020, **12**, 37258-

- 37264.
- [6]. K. Chu, J. Wang, Y. P. Liu, Q. Q. Li and Y. L. Guo, *J. Mater. Chem. A*, 2020, **8**, 7117-7124.
  - [7]. K. Chu, Y. P. Liu, Y. B. Li, Y. L. Guo and Y. Tian, *ACS Appl. Mater. Inter.*, 2020, **12**, 7081-7090.
  - [8]. S. J. Clark, M. D. Segall, C. J. Pickard, P. J. Hasnip, M. I. J. Probert, K. Refson and M. C. Payne, *Z. Kristallogr.*, 2005, **220**, 567-570.
  - [9]. A. A. Peterson, *Energy Environ. Sci.*, 2010, **3**, 1311-1315.
  - [10]. X. Li, T. Li, Y. Ma, Q. Wei, W. Qiu, H. Guo, X. Shi, P. Zhang, A. M. Asiri and L. Chen, *Adv. Energy. Mater.*, 2018, **8**, 1801357.
  - [11]. J. Q. Tian, Q. Liu, A. M. Asiri and X. P. Sun, *J. Am. Chem. Soc.*, 2014, **136**, 7587-7590.
  - [12]. J. Han, Z. Liu, Y. Ma, G. Cui, F. Xie, F. Wang, Y. Wu, S. Gao, Y. Xu and X. Sun, *Nano Energy*, 2018, **52**, 264-270.
  - [13]. H. Luo, M. Wei and K. Wei, *Mater. Chem. Phys.*, 2010, **120**, 6-9.
  - [14]. F. Li, L. Chen, G. P. Knowles, D. R. MacFarlane and J. Zhang, *Angew. Chem. Int. Edit.*, 2017, **56**, 505-509.
  - [15]. H. Zhang, Q. He, F. Wei, Y. Tan, Y. Jiang, G. Zheng, G. Ding and Z. Jiao, *Mater. Lett.*, 2014, **120**, 200-203.
  - [16]. J. Wang, L. Yu, L. Hu, G. Chen, H. Xin and X. Feng, *Nat. Commun.*, 2018, **9**, 1795.
  - [17]. L. Han, X. Liu, J. Chen, R. Lin, H. Liu, F. Lu, S. Bak, Z. Liang, S. Zhao and E. Stavitski, *Angew. Chem. Int. Edit.*, 2018, **58**, 2321-2325.
  - [18]. Z. Geng, Y. Liu, X. Kong, P. Li, K. Li, Z. Liu, J. Du, M. Shu, R. Si and J. Zeng, *Adv. Mater.*, 2018, **30**, 1803498.
  - [19]. J. Han, X. Ji, X. Ren, G. Cui, L. Li, F. Xie, H. Wang, B. Li and X. Sun, *J. Mater. Chem. A*, 2018, **6**, 12974-12977.
  - [20]. H. Cheng, L. X. Ding, G. F. Chen, L. Zhang, J. Xue and H. Wang, *Adv. Mater.*, 2018, **30**, 1803694.
  - [21]. J. X. Yao, D. Bao, Q. Zhang, M. M. Shi, Y. Wang, R. Gao, J. M. Yan and Q. Jiang, *Small Methods*, 2018, **3**, 1800333.
  - [22]. Y. Liu, M. Han, Q. Xiong, S. Zhang, C. Zhao, W. Gong, G. Wang, H. Zhang and H. Zhao, *Adv. Energy. Mater.*, 2019, **9**, 1803935.
  - [23]. L. Xia, X. Wu, Y. Wang, Z. Niu, Q. Liu, T. Li, X. Shi, A. M. Asiri and X. Sun, *Small Methods*, 2018, **3**, 1800251.
  - [24]. L. Zhang, X. Ren, Y. Luo, X. Shi, A. M. Asiri, T. S. Li and X.-P. Sun, *Chem. Commun.*, 2018.
  - [25]. Y. P. Liu, Y. B. Li, H. Zhang and K. Chu, *Inorg. Chem.*, 2019, **58**, 10424-10431.
  - [26]. L. Zhang, M. Cong, X. Ding, Y. Jin, F. Xu, Y. Wang, L. Chen and L. Zhang, *Angew. Chem. Int. Edit.*, 2020, **132**, 10980-10985.
  - [27]. K. Chu, Y. Liu, Y. Li, J. Wang and H. Zhang, *ACS Appl. Mater. Inter.*, 2019, **11**, 31806-31815.
  - [28]. L. Huang, J. Wu, P. Han, A. M. Al-Enizi, T. M. Almutairi, L. Zhang and G. Zheng, *Small Methods*, 2019, **3**, 1800386.
